# Supplementary material for: Estimation of daily interfractional larynx residual setup error after isocentric alignment for head and neck radiotherapy: quality assurance implications for target volume and organs‐at‐risk margination using daily CT on‐rails imaging
Source: PubMed Central journal article supplement (PMC5016194; doi:10.1120/jacmp.v16i1.5108), 2014-01-08
Supplement: NIHMS814175-supplement-supplement_1.pdf [file NIHMS814175-supplement-supplement_1.pdf]

**Supplementary figure 1.**

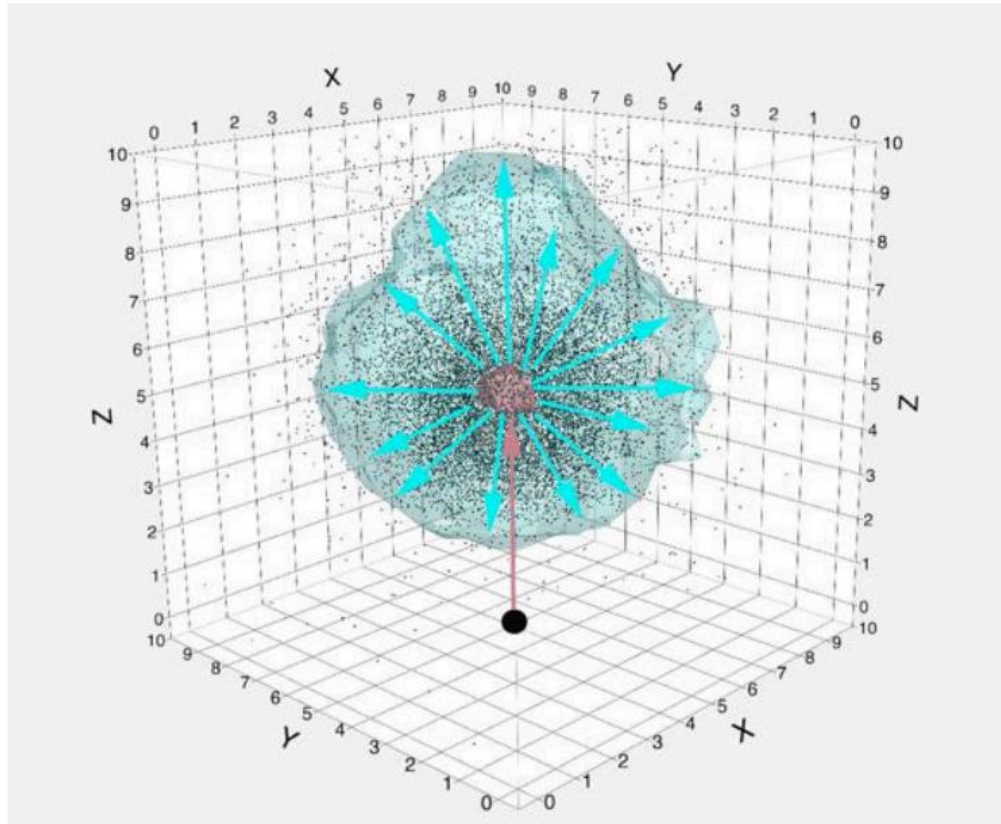

**Supplementary figure 1.** Three-dimensional scatterplot illustrating the difference between the systemic errors of representative points of interest distribution from a starting point (black circle) presented as a red cloud and the random errors represented as a light blue cloud. The appropriate CTV-PTV and OAR-PRV margins accounts for both the systematic and random error component.
